# Supplementary material for: Optimization of aptamer-triggered hybridization chain reaction for rapid visual ATP detection using gold nanoparticles
Source: Royal Society of Chemistry journal article supplement (doi:10.1039/d5ay01738f), 2026-01-01
Supplement: d5ay01738f1.pdf [file d5ay01738f1.pdf]

## Supplementary information

### Optimization of aptamer-triggered hybridization chain reaction for rapid visual ATP detection using gold nanoparticles

Shengli Zhou,<sup>a</sup> Hiroko Fukaya,<sup>a</sup> Shunsuke Watanuki,<sup>a</sup> Wei Liu,<sup>a</sup> Maasa Yokomori,<sup>a</sup>  
Muneyuki Matsuo,<sup>a,c</sup> Kazuya Okada,<sup>b</sup> Yukina Yoshioka,<sup>b</sup> Keitaro Yoshimoto,<sup>\*a</sup>

<sup>a</sup> *Department of Life Sciences, Graduate School of Arts and Sciences, The University of  
Tokyo, 3-8-1 Komaba, Meguro, Tokyo, 153-8902, Japan*

<sup>b</sup> *Daikin Industries, Ltd., 1-1 Nishi-Hitotsuya, Settsu-shi, Osaka, 566-8585, Japan*

<sup>c</sup> *Graduate School of Integrated Science for Life, Hiroshima University, 1-3-1  
Kagamiyama, Higashi-Hiroshima, Hiroshima, 739-8526, Japan*

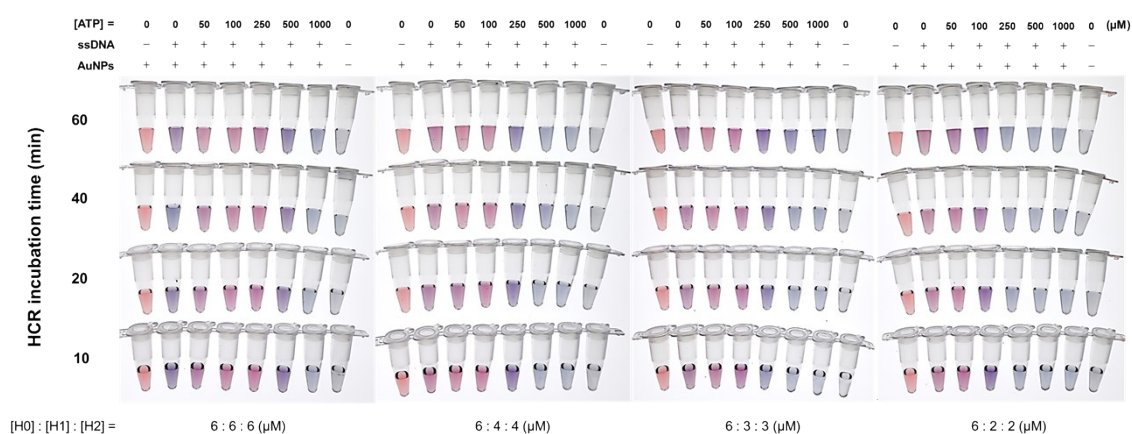

**Figure S1.** ATP concentration dependences in the color development of AuNPs at different concentration ratio of H0, H1, and H2 after different concentration HCR incubation time. These color changes were observed 5 min after mixing the HCR product with AuNP solution at 25 °C. Mixing conditions: 60 μL of AuNP solution with 4 μL of HCR solution. HCR was carried out under the experimental condition as follows; [MgCl<sub>2</sub>] = 10 mM, [NaCl] = 300 mM. Similar results were obtained in three independent experiments.

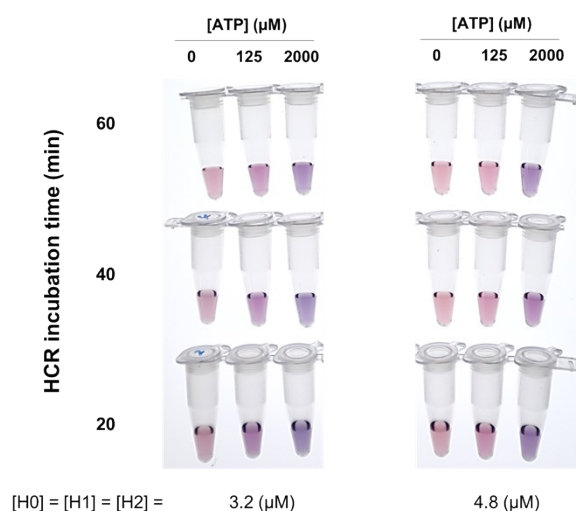

**Figure S2.** ATP concentration dependences in the color development of AuNPs at different concentration ratio of H0, H1, and H2 after different HCR incubation time. These color changes were observed 5 min after mixing the HCR product with AuNP solution at 25 °C. Mixing conditions: 40 μL of AuNP solution with 2 μL of HCR solution. HCR was carried out under the experimental condition as follows; [MgCl<sub>2</sub>] = 10 mM, [NaCl] = 300 mM. Similar results were obtained in three independent experiments.

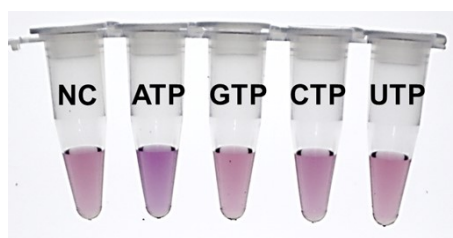

**Figure S3.** Specificity evaluation of the rapid visual ATP detection system. HCR was performed for 10 min at 25 °C under the following condition; [H0] : [H1] : [H2] = 6 : 2 : 2  $\mu$ M, [NTPs (ATP, GTP, CTP and UTP)] = 100  $\mu$ M, [MgCl<sub>2</sub>] = 10 mM and [NaCl] = 300 mM. A no-NTP condition was used as negative control (NC). These color changes were observed 5 min after mixing the HCR product with AuNP solution at 25 °C. Mixing conditions: 60  $\mu$ L of AuNP solution with 4  $\mu$ L of HCR solution. Similar results were obtained in three independent experiments.
